# Supplementary material
Source: PubMed Central journal article supplement (PMC5953357)
Supplement: tpmd170399.SD1.pdf [file tpmd170399.SD1.pdf]

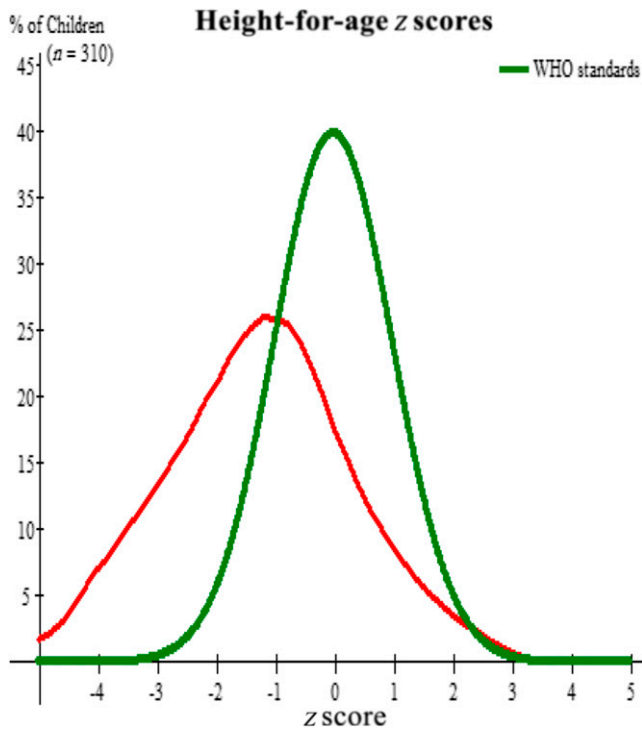

SUPPLEMENTAL FIGURE 1. Prevalence of stunting 31.6%.

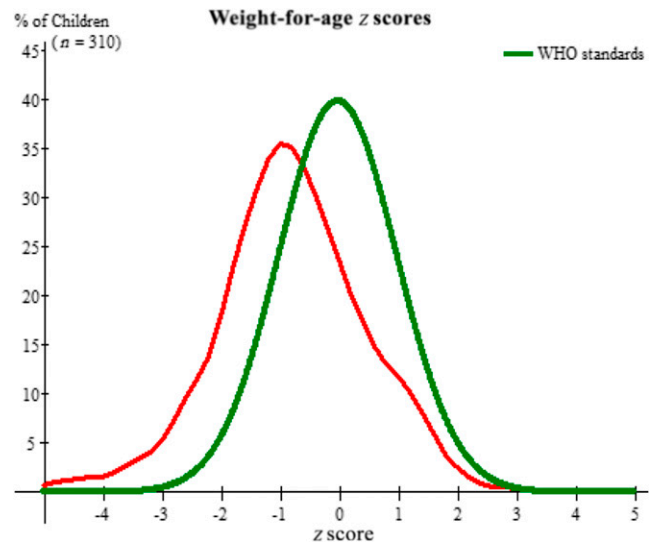

SUPPLEMENTAL FIGURE 3. Prevalence of underweight 15.5%.

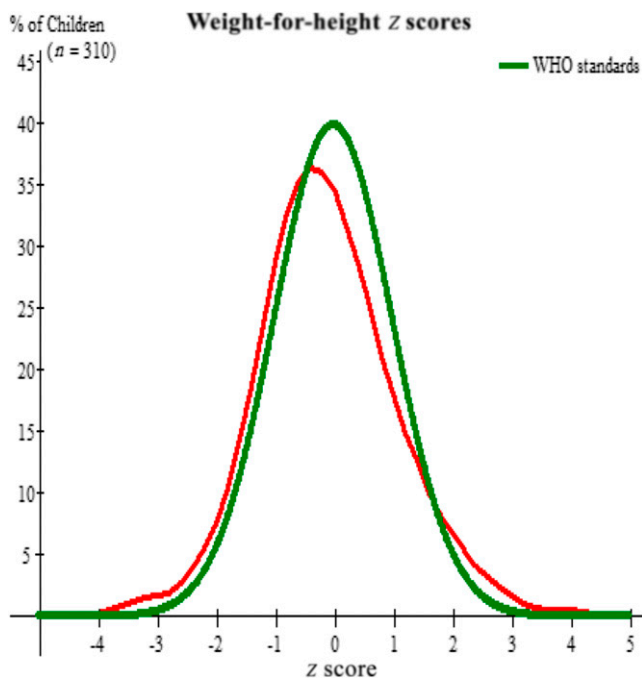

SUPPLEMENTAL FIGURE 2. Prevalence of wasting 4.5%.

SUPPLEMENTAL TABLE 1  
Demographic characteristics of the population under study

| Description                                  | Number N = 310 | Percentage |
|----------------------------------------------|----------------|------------|
| Name of the district                         |                |            |
| Longido                                      | 150            | 48.4       |
| Monduli                                      | 160            | 51.6       |
| Name of the village                          |                |            |
| Orbomba                                      | 86             | 27.7       |
| Kimokouwa                                    | 64             | 20.6       |
| Meserani                                     | 79             | 25.5       |
| Makuyuni                                     | 81             | 26.1       |
| Child age                                    |                |            |
| 6–12 months                                  | 61             | 19.7       |
| > 12–24 months                               | 67             | 21.6       |
| > 24–36 months                               | 68             | 22         |
| > 36–48 months                               | 57             | 18.4       |
| > 48–59 months                               | 57             | 18.4       |
| Mother's age                                 |                |            |
| 16–19                                        | 9              | 2.9        |
| 20–29                                        | 173            | 55.8       |
| 30–39                                        | 98             | 31.6       |
| 40 and older                                 | 30             | 9.7        |
| Mother's level of education                  |                |            |
| No education                                 | 144            | 46.5       |
| Primary education                            | 144            | 46.5       |
| Secondary and high school                    | 16             | 6.1        |
| College and university                       | 3              | 1          |
| Expenditure per day in Tshs                  |                |            |
| Below 1\$                                    | 8              | 2.6        |
| Between 1\$ to 5\$                           | 270            | 87.1       |
| Above 5\$                                    | 18             | 5.8        |
| I don't know                                 | 14             | 4.5        |
| Type of household                            |                |            |
| Father headed                                | 297            | 95.8       |
| Mother headed                                | 13             | 4.2        |
| Occupation of head of family                 |                |            |
| Business and livestock keeping               | 83             | 26.7       |
| Agriculture and livestock keeping            | 204            | 65.8       |
| Agriculture, livestock keeping, and business | 23             | 7.4        |
| Marital status                               |                |            |
| Single                                       | 2              | 0.6        |
| Married                                      | 298            | 96.1       |
| Divorced                                     | 1              | 0.3        |
| Separated                                    | 1              | 0.3        |
| Widower                                      | 8              | 2.6        |

SUPPLEMENTAL TABLE 2  
Independent predictors of stunting among under-five children in pastoral communities

| Variable                                               | n   | Stunting % | COR (95% CI)  | P value | AOR (95% CI)  | P value |
|--------------------------------------------------------|-----|------------|---------------|---------|---------------|---------|
| Main source of domestic water                          |     |            |               |         |               |         |
| Tap water                                              | 189 | 21.2       | 1             | –       | 1             | –       |
| Surface water                                          | 121 | 48.8       | 3.5 (2.2–5.8) | 0.000   | 13 (5.8–30)   | 0.000   |
| Time the CF was introduced to the child                |     |            |               |         |               |         |
| Before 6 months                                        | 278 | 50         | 2.3 (1.1–4.9) | 0.02    | 2.8 (1.2–6.5) | 0.02    |
| 6 months and older                                     | 32  | 30         | 1             | –       | 1             | –       |
| Child having diarrhea for the past 2 weeks             |     |            |               |         |               |         |
| Yes                                                    | 88  | 41         | 1.8 (1.1–2.9) | 0.03    | 2.6 (1.4–5)   | 0.004   |
| No                                                     | 222 | 28.4       | 1             | –       | 1             | –       |
| How cow's milk is prepared before feeding to the child |     |            |               |         |               |         |
| Boiled                                                 | 243 | 31.7       | 1             | –       | 1             | –       |
| Not boiled                                             | 67  | 32.8       | 1.1 (0.6–1.9) | 0.9     | 1.8 (1–3.8)   | 0.1     |
| Means of storing already prepared CF                   |     |            |               |         |               |         |
| Thermos/hotpot                                         | 213 | 30         | 1             | –       | 1             | –       |
| Traditional calabash                                   | 97  | 36.1       | 1.3 (0.8–2.2) | 0.3     | 1.2 (0.6–2.4) | 0.7     |
| Number of wives under single husband                   |     |            |               |         |               |         |
| Single wife/monogamy                                   | 126 | 22.2       | –             | –       | –             | –       |
| More than one wife/polygamy                            | 184 | 50         | 2.3 (1.1–4.9) | 0.02    | 2.5 (1.4–4.4) | 0.003   |
| Mother's level of education                            |     |            |               |         |               |         |
| No formal education                                    | 145 | 43.4       | –             | –       | –             | –       |
| With formal education                                  | 165 | 22         | 3.4 (1.6–5.9) | 0.000   | 2.8 (1.4–4.8) | 0.001   |

CF = complementary foods.

SUPPLEMENTAL TABLE 3  
Independent predictors for underweight among under-five children in pastoral communities

| Variable                                               | N   | Underweight % | COR (95% CI)  | P value | AOR (95% CI)   | P value |
|--------------------------------------------------------|-----|---------------|---------------|---------|----------------|---------|
| Main source of domestic water                          |     |               |               |         |                |         |
| Tap water                                              | 189 | 6.3           | 1             |         | 1              |         |
| Surface water                                          | 121 | 32.2          | 7 (3.5–14.1)  | 0.000   | 9.2 (9.1–60.5) | 0.000*  |
| Time the CF was introduced to the child                |     |               |               |         |                |         |
| Before 6 months                                        | 278 | 18.8          | 0.8 (0.3–2.2) | 0.7     | 1.9 (0.7–5.9)  | 0.3     |
| 6 months and older                                     | 32  | 16.2          | 1             |         | 1              |         |
| Child having diarrhea for the past 2 weeks             |     |               |               |         |                |         |
| Yes                                                    | 88  | 19.3          | 1.3 (0.7–2.5) | 0.4     | 2.5 (1.1–6)    | 0.004*  |
| No                                                     | 222 | 11.9          | 1             | –       | 1              | –       |
| How cow's milk is prepared before feeding to the child |     |               |               |         |                |         |
| Boiled                                                 | 243 | 11.9          | 1             | –       | 1              | –       |
| Unboiled                                               | 67  | 17.7          | 1.6 (0.7–3.6) | 0.3     | 2.5 (1–6.7)    | 0.05*   |
| Means of storing already prepared CF                   |     |               |               |         |                |         |
| Thermos/hotpot                                         | 213 | 14.4          | 1             | –       | 1              | –       |
| Traditional calabash                                   | 97  | 17.4          | 1.3 (0.6–2.4) | 0.5     | 1.5 (0.7–3.8)  | 0.4     |
| Gender of the child                                    |     |               |               |         |                |         |
| Male                                                   | 155 | 18.2          | 1             | –       | 1              | –       |
| Female                                                 | 155 | 12.3          | 2 (1.1–4.2)   | 0.04    | 2.1 (1.1–3.9)  | 0.03    |
| Mothers level of education                             |     |               |               |         |                |         |
| No formal education                                    | 145 | 23.4          | 1             | –       | 1              | –       |
| With formal education                                  | 165 | 10.3          | 2.3 (1.3–5.1) | 0.002   | 2.9 (1.5–5.4)  | 0.001   |

CF = complementary foods.

\* Symbol means significant level which is  $P < 0.05$ .
